# Supplementary material for: Ultrahigh-performance self-powered photodetectors based on hexagonal YbMnO3 ferroelectric thin films by the polarization-induced ripple effect
Source: Royal Society of Chemistry journal article supplement (doi:10.1039/d2qi01774a), 2022-01-01
Supplement: d2qi01774a1.pdf [file d2qi01774a1.pdf]

## Supporting Information

### Ultrahigh-Performance Self-Powered Photodetector Based on Hexagonal $\text{YbMnO}_3$ Ferroelectric Thin Film by Polarization-Induced Ripple Effect

Shan Zhang<sup>#</sup>, Ao Gong<sup>#</sup>, Xinxiang Yang, Pei Han, Ningning Sun, Yong Li<sup>\*</sup>, Liwen Zhang<sup>\*</sup>, Xihong Hao<sup>\*</sup>

*Inner Mongolia Key Laboratory of Ferroelectric-Related New Energy Materials and Devices,  
School of Materials and Metallurgy, Inner Mongolia University of Science and Technology,  
Baotou, 014010, China*

*E-mail addresses: liyong3062545@126.com, nkdzlw@imust.edu.cn, xihonghao2022@163.com*

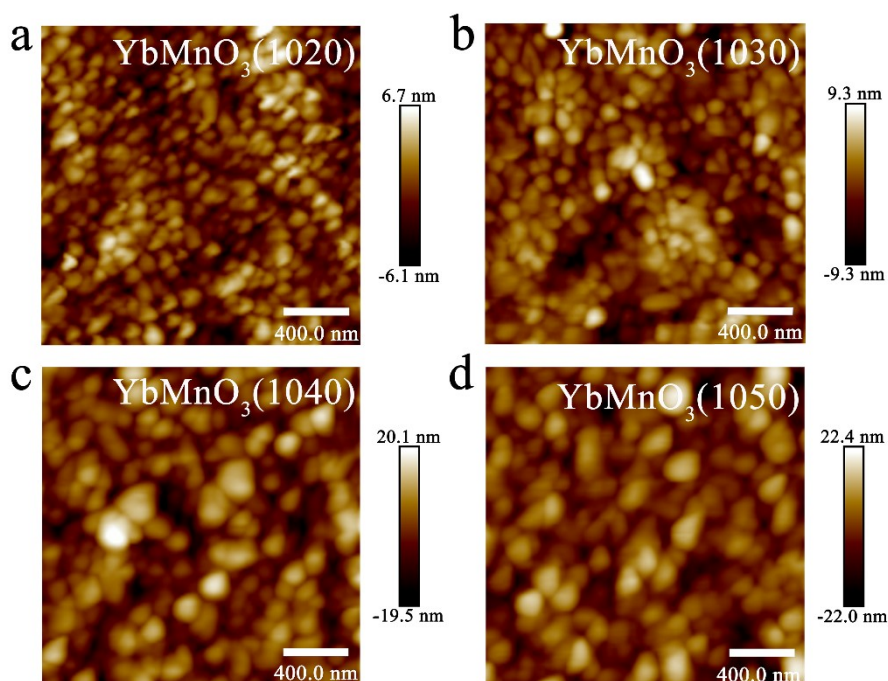

Fig. S1 AFM image of the *h*- $\text{YbMnO}_3$  thin films.

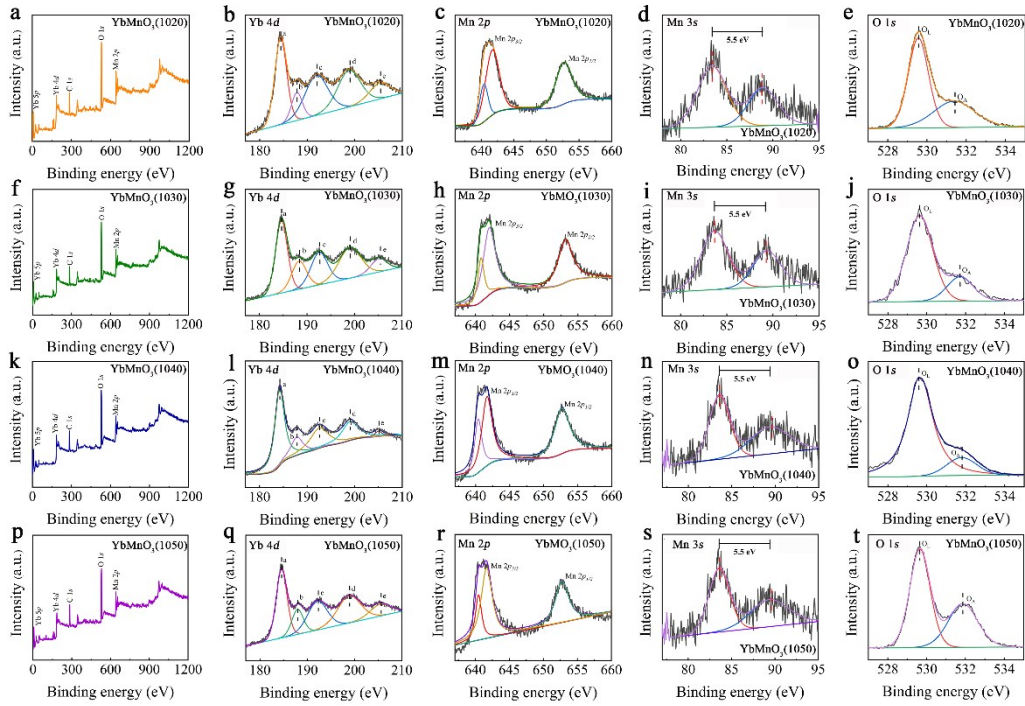

**Fig. S2 XPS spectrum of the YbMnO<sub>3</sub> thin film with different sintering temperature.**

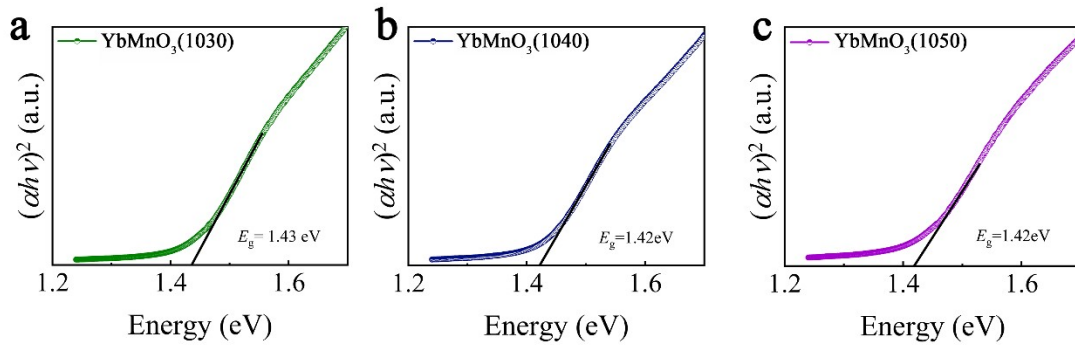

**Fig. S3 The  $(\alpha h\nu)^2$  versus  $h\nu$  curve of the YbMnO<sub>3</sub>(1030), YbMnO<sub>3</sub>(1040) and YbMnO<sub>3</sub>(1050).**

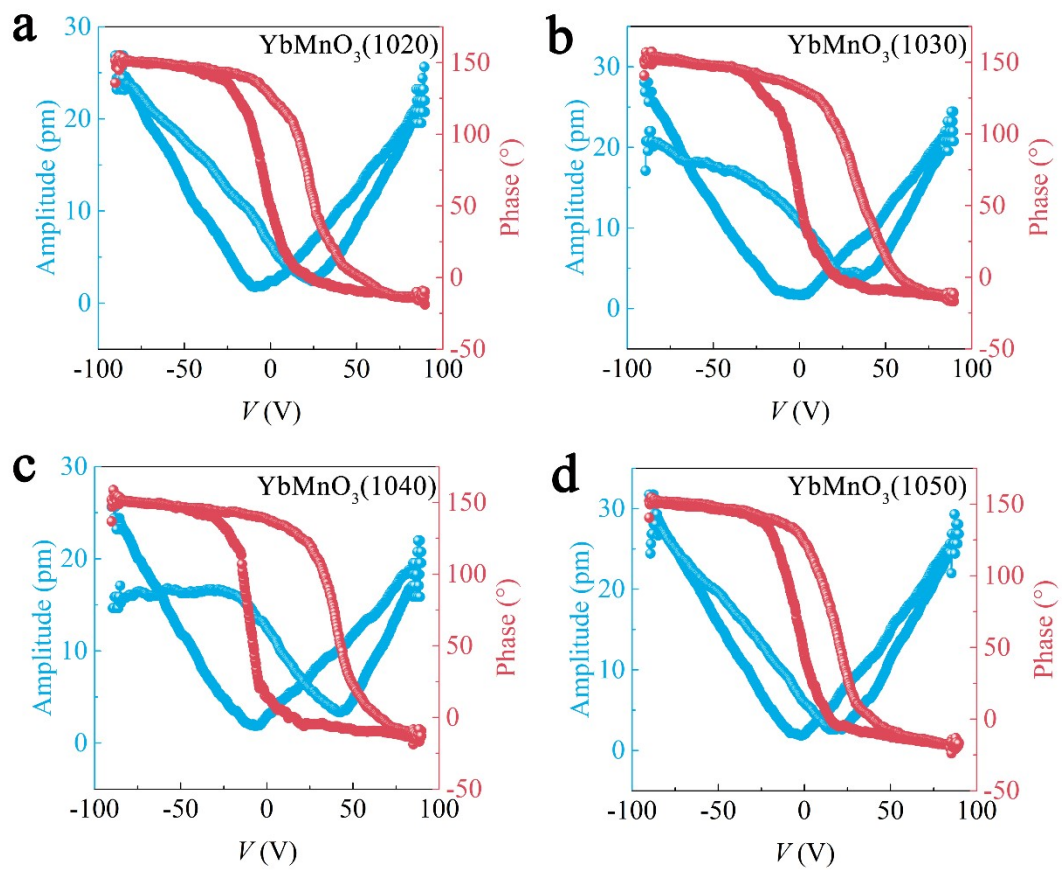

**Fig. S4** PFM phase and amplitude loops of the *h*-YbMnO<sub>3</sub> thin film versus voltages.
